# Supplementary material for: CD8+ T cell-derived Fgl2 regulates immunity in a cell-autonomous manner via ligation of FcγRIIB
Source: PubMed Central journal article supplement (PMC11190225; doi:10.1038/s41467-024-49475-8), 2024-06-20
Supplement: 41467_2024_49475_MOESM1_ESM.pdf [file 41467_2024_49475_MOESM1_ESM.pdf]

# CD8<sup>+</sup> T cell-derived Fgl2 regulates immunity in a cell-autonomous manner via ligation of FcγRIIB

Supplementary Information

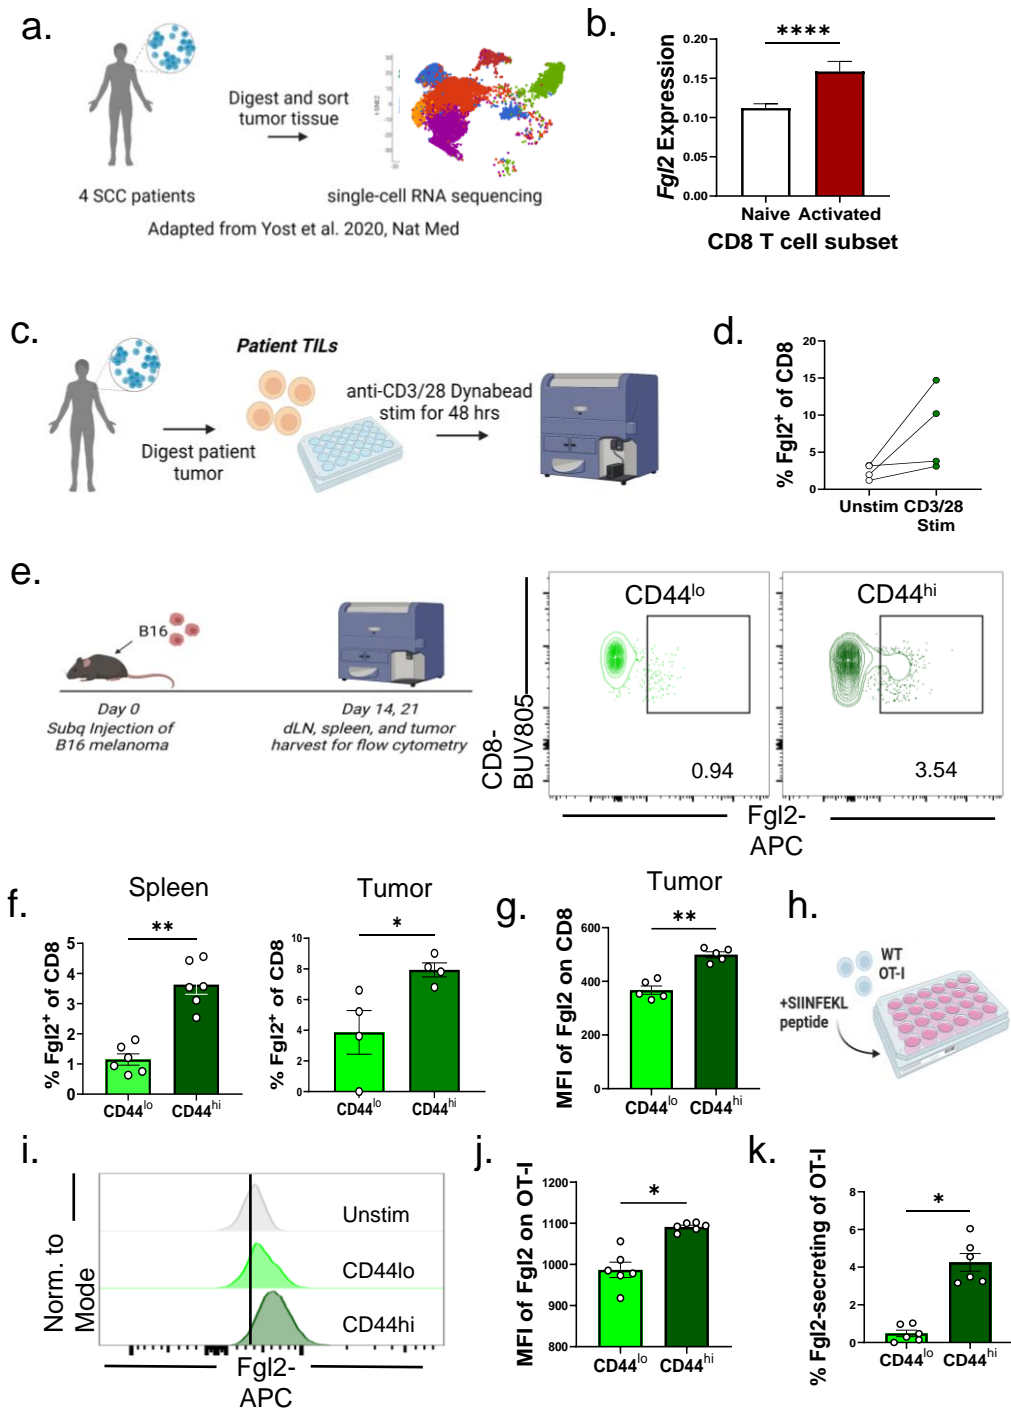

Supplementary Figure 1. *Fgl2* gene is expressed and Fgl2 protein is secreted by activated CD8<sup>+</sup> T cells in humans and mice. (A) Schematic and (B) summary data of *Fgl2* RNA expression on naïve vs. activated CD8<sup>+</sup> T cells at the tumor of four squamous cell carcinoma patients from a publicly available dataset deposited by Yost et al.<sup>1</sup> (C) Schematic and (D) summary data of Fgl2 protein expression on CD3<sup>+</sup>CD8<sup>+</sup> TIL from digested melanoma patient tumor (n=4 patients) after a 48-hour CD3/28 Dynabead stimulation. (E) Schematic and representative flow plots as well as (F) summary data showing frequency of Fgl2<sup>+</sup> on CD44<sup>lo</sup> vs. CD44<sup>hi</sup> CD8<sup>+</sup> T cells stimulated with SIINFEKL peptide *ex vivo* from the spleen (n=6 mice) and tumor (n=4 mice) of B16-OVA challenged mice. (G) Mean fluorescence intensity of Fgl2 on *ex vivo* stimulated CD8<sup>+</sup> T cells from the tumor is also shown n=5 mice). Representative data from two independent experiments. (H) Schematic showing multiday *in vitro* stimulation of OT-I, (I) representative flow histograms and summary data showing (J) mean fluorescence intensity and (K) frequency of Fgl2<sup>+</sup> OT-I after three-day stimulation with SIINFEKL peptide compared to unstimulated controls. Representative data from two independent experiments, n=6 per group. Mann-Whitney non-parametric, unpaired two-sided test was used. The error bar in summary figures denotes mean ± SEM. \*p<0.05 \*\*p<0.01. Supplementary Figure 1A, 1C, 1E, and 1H was created with BioRender.com released under a Creative Commons Attribution-NonCommercial-NoDerivs 4.0 International license.

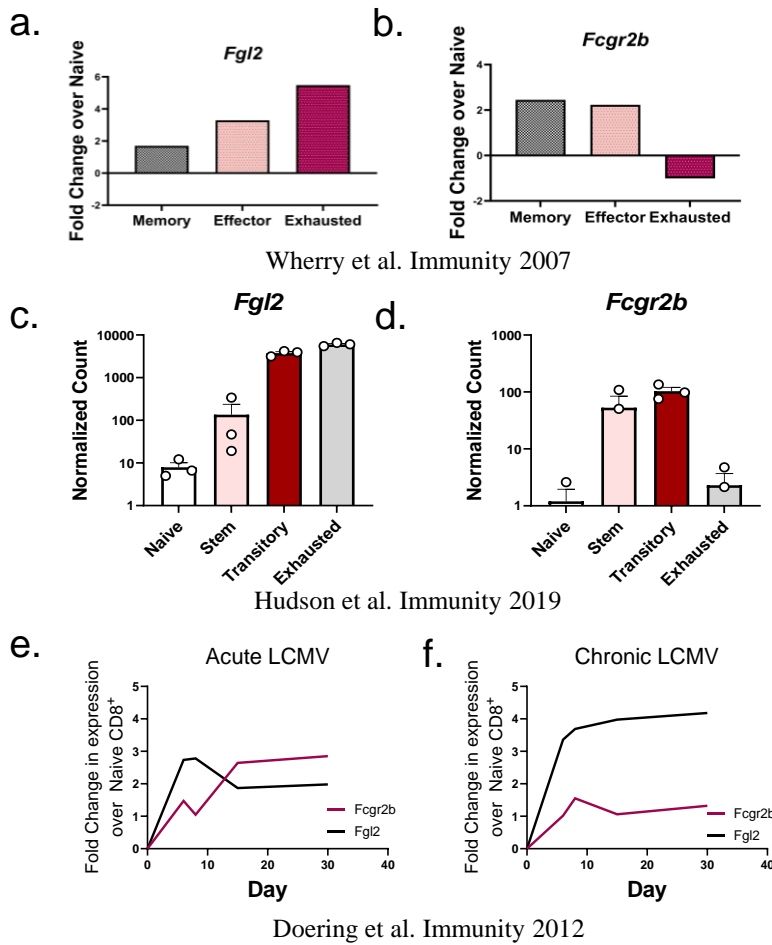

Supplementary Figure 2. *Fgl2* is expressed on differentiated CD8<sup>+</sup> T cells in published datasets, notably when *Fcgr2b* expression is lowest. Bar graphs showing RNA expression of (A) *Fgl2* and (B) *Fcgr2b* in memory, effector, and exhausted CD8<sup>+</sup> T cells as a fold change over naïve CD8<sup>+</sup> during LCMV Clone 13 infection, both genes were differentially expressed in work by Wherry et al. in various CD8<sup>+</sup> T cell subsets<sup>2</sup>. Average fold change shown of n=3 samples. Bar graphs showing RNA expression of (C) *Fgl2* and (D) *Fcgr2b* in naïve, stem-like, transitory, and exhausted CD8<sup>+</sup> T cells as normalized read count during LCMV Clone 13 in work by Hudson et al.<sup>3</sup>, n=3 samples per subset. Longitudinal RNA expression of *Fgl2* and *Fcgr2b* in gp33-specific CD8<sup>+</sup> T cells as fold change over naïve CD8<sup>+</sup> on days 6, 8, 15, and 30 post LCMV (E) Armstrong (acute) or (F) Clone 13 (chronic) viral infection in work by Doering et al.<sup>4</sup>, average fold change is shown of n=4 samples per day per group. The error bar denotes mean ± SEM.

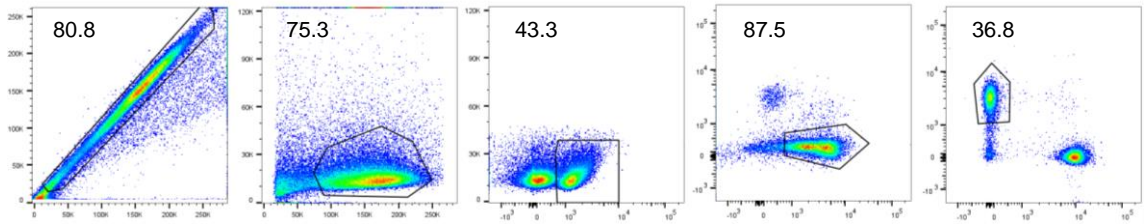

FSC-A/FSC-H → FSC-A/SSC-A → CD45/SSC-A → CD3/CD14&CD19 → CD4/CD8

Supplementary Figure 3. Flow cytometry gating strategy. Representative flow cytometry gating strategy is shown for the following experiments: Figure 1A-1E, Figure 2C-2G, 2I, 2J, 2L-2N, 2P-2R, Figure 3D-3I, Figure 4B-4E, 4G-4J, 4L-4Q, Supp. Data Fig. 1E-1K, and Supp. Data Fig. 3C-3G. First, events were gated on singlets via FSC-A/FSC-H. Lymphocytes were then gated using FSC-A/SSC-A followed by positive staining for the leukocyte marker CD45. CD3<sup>+</sup> CD14<sup>-</sup> CD19<sup>-</sup> were next identified and subsequently CD8<sup>+</sup> CD4<sup>-</sup> T cells were gated. This gating strategy was used to exclude contaminating CD14<sup>+</sup> monocytes and CD19<sup>+</sup> B cells as these cell types express a high level of FcγRIIB. Subsequent gates of this gating strategy are shown in the appropriate figure.

Supplementary Table 1. Antibodies used in this study.

| Antibody/Resource (anti-mouse)           | Clone            | Source         |
|------------------------------------------|------------------|----------------|
| biotinylated CD16/32                     | 2.4G2 (1:100)    | BD Biosciences |
| biotinylated IgG2b kappa isotype control | 27-35 (1:100)    | BD Biosciences |
| CD4- BUV496                              | GK1.5 (1:100)    | BD Biosciences |
| CD8- BUV805                              | 53-6.7 (1:100)   | BD Biosciences |
| CD3- BUV737                              | 17A2 (1:100)     | BD Biosciences |
| CD19- BV510                              | 6D5 (1:200)      | Biolegend      |
| CD14- BV510                              | Sa14-2 (1:200)   | Biolegend      |
| CD44- APC-Cy7                            | IM7 (1:300)      | Biolegend      |
| CD62L- PE-Cy7                            | MEL-14 (1:100)   | Biolegend      |
| Thy1.1- BV711                            | OX-7 (1:100)     | Biolegend      |
| Thy1.2- PerCP                            | 53-2.1 (1:100)   | Biolegend      |
| PD-1- PE-Dazzle, BV421                   | 29F.1A12 (1:100) | Biolegend      |
| Streptavidin- APC, BV711                 | N/A (1:200)      | Biolegend      |
| TIM3- BUV395, BV786                      | 5D12 (1:100)     | BD Biosciences |
| CD45.1- BV510                            | A20 (1:100)      | Biolegend      |
| CD45.2- BV605                            | 104 (1:100)      | Biolegend      |
| Eomes- BUV395                            | X4-83 (1:50)     | BD Biosciences |
| TCF7/TCF1-BV421                          | S33-966 (1:50)   | BD Biosciences |
| Ki-67- PE, BV605                         | 11F6 (1:100)     | Biolegend      |
| Fgl2- PE                                 | 6D9 (1:300)      | Abnova         |

Supplementary Table 2. Demographic and clinicopathologic data for patients with advanced stage melanoma (n=4).

| Analysis of FcγRIIB <sup>+</sup> tumor-infiltrating lymphocytes (TIL) |                                       |                     |
|-----------------------------------------------------------------------|---------------------------------------|---------------------|
| Variable                                                              | Parameter                             | No. of patients (%) |
| Sex                                                                   | Female                                | 3 (75)              |
|                                                                       | Male                                  | 1 (25)              |
| Age                                                                   | <65                                   | 3 (75)              |
|                                                                       | ≥65                                   | 1 (25)              |
| Race                                                                  | White                                 | 3 (75)              |
|                                                                       | Unknown                               | 1 (25)              |
|                                                                       | Non-White                             | 0 (0)               |
| Anatomic Site                                                         | Skin                                  | 3 (75)              |
|                                                                       | Lymph node                            | 1 (25)              |
| Stage                                                                 | I                                     | 1 (25)              |
|                                                                       | II                                    | 0 (0)               |
|                                                                       | III                                   | 2 (50)              |
|                                                                       | Unknown                               | 1 (25)              |
| Treatment                                                             | Chemotherapy + Ipilumimab + Nivolumab | 0 (0)               |
|                                                                       | Radiation + Ipilumimab + Nivolumab    | 0 (0)               |
|                                                                       | Nivolumab                             | 1 (25)              |
|                                                                       | Pembrolizumab                         | 1 (25)              |
|                                                                       | None                                  | 2 (50)              |

## SUPPLEMENTARY REFERENCES

- 1 Yost, K. E. *et al.* Clonal replacement of tumor-specific T cells following PD-1 blockade. *Nat. Med.* **25**, 1251-1259 (2019). <https://doi.org:10.1038/s41591-019-0522-3>
- 2 Wherry, E. J. *et al.* Molecular Signature of CD8<sup>+</sup> T Cell Exhaustion during Chronic Viral Infection. *Immunity* **27**, 670-684 (2007).  
<https://doi.org:https://doi.org/10.1016/j.immuni.2007.09.006>
- 3 Hudson, W. H. *et al.* Proliferating Transitory T Cells with an Effector-like Transcriptional Signature Emerge from PD-1<sup>+</sup> Stem-like CD8<sup>+</sup> T Cells during Chronic Infection. *Immunity* **51**, 1043-1058.e1044 (2019).  
<https://doi.org:10.1016/j.immuni.2019.11.002>
- 4 Doering, T. A. *et al.* Network analysis reveals centrally connected genes and pathways involved in CD8<sup>+</sup> T cell exhaustion versus memory. *Immunity* **37**, 1130-1144 (2012).  
<https://doi.org:10.1016/j.immuni.2012.08.021>
